# Supplementary material for: Observation of a magnetic phase transition but absence of an electrical response in a new two-dimensional mixed-valence nickel-bis-dithiolene molecular crystal
Source: Royal Society of Chemistry journal article supplement (doi:10.1039/c4ra13354d), 2015-01-01
Supplement: c4ra13354d1.pdf [file c4ra13354d1.pdf]

## ESI

### **Observation of a magnetic phase transition but absence of electrical response in a novel new two-dimensional mixed-valence nickel-bis-dithiolene molecular crystal**

Hao Yang,<sup>a</sup> De-Yue An,<sup>b</sup> Jian-Lan Liu,<sup>a</sup> Xiao-Ming Ren,<sup>\*a,c,d</sup> Lan-Cheng Zhou,<sup>a</sup>  
Hua-Bing Wang<sup>\*b</sup>

<sup>a</sup> *State Key Laboratory of Materials-Oriented Chemical Engineering and College of Science, Nanjing Tech University, Nanjing 210009, People's Republic of China*

<sup>b</sup> *Research Institute of Superconductor Electronics, Nanjing University, Nanjing 210093, People's Republic of China*

<sup>c</sup> *College of Materials Science and Engineering, Nanjing Tech University, Nanjing 210009, People's Republic of China*

<sup>d</sup> *State Key Laboratory & Coordination Chemistry Institute, Nanjing University, Nanjing 210093, People's Republic of China*

Phone: +86 25 58139476

Fax: +86 25 58139481

E-mail: [xmren@njtech.edu.cn](mailto:xmren@njtech.edu.cn) (XMR)

[hbwang@nju.edu.cn](mailto:hbwang@nju.edu.cn) (HBW)

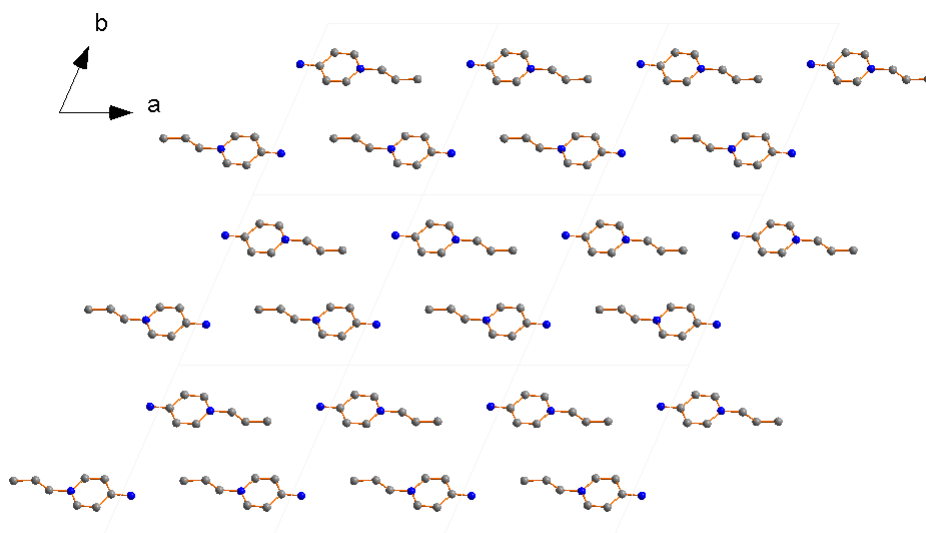

Figure S1 The stacking patterns of cations of **1** (hydrogen atoms are omitted for clarity).

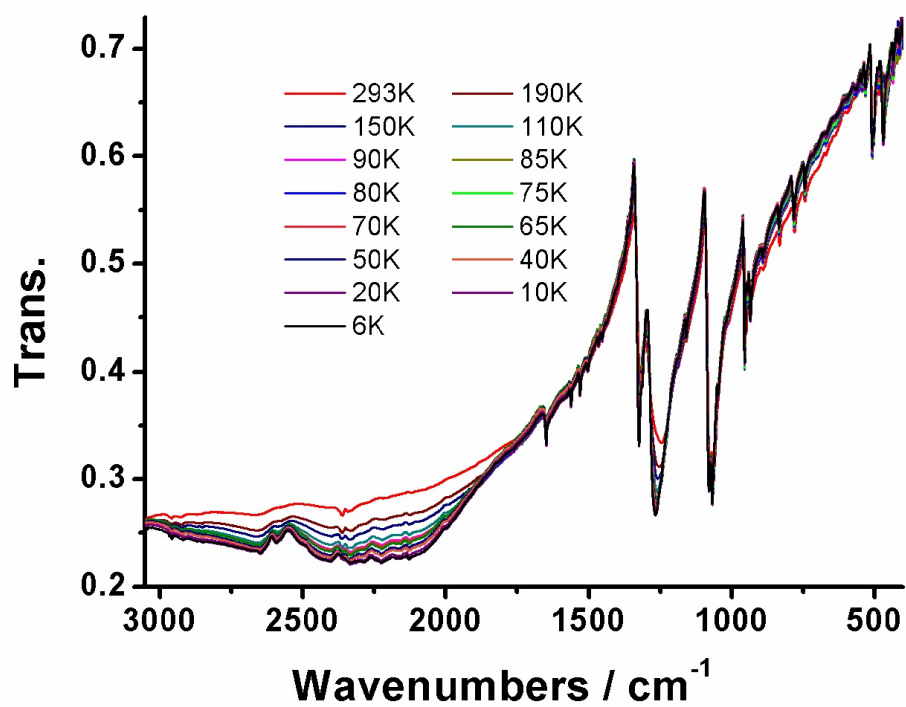

Figure S2 Temperature dependent IR spectra of **1**.

Figure S3 PXRD patterns of **1** at room temperature.

Figure S4 Thermogravimetric (red) and DSC (blue) curves of **1**.
